# Supplementary material for: Simultaneous Detection of Dihydroxybenzene Isomers Using Electrochemically Reduced Graphene Oxide-Carboxylated Carbon Nanotubes/Gold Nanoparticles Nanocomposite
Source: MDPI journal article supplement (doi:10.3390/bios11090321), 2021-09-07
Supplement: s1 [file s1]

# Simultaneous Detection of Dihydroxybenzene Isomers Using Electrochemically Reduced Graphene Oxide-Carboxylated Carbon Nanotubes/Gold Nanoparticles Nanocomposite

Angélica Domínguez-Aragón <sup>1</sup>, Rocio B. Dominguez <sup>2</sup> and Erasto Armando Zaragoza-Contreras <sup>1,\*</sup>

<sup>1</sup> Centro de Investigación en Materiales Avanzados, S.C., Miguel de Cervantes No. 120, Chihuahua C.P. 31136, Chih, México; [angelica.dominguez@cimav.edu.mx](mailto:angelica.dominguez@cimav.edu.mx)

<sup>2</sup> CONACyT-Centro de Investigación en Materiales Avanzados, S.C., Miguel de Cervantes 120, Chihuahua C.P. 31136, Chih, México; [berenice.dominguez@cimav.edu.mx](mailto:berenice.dominguez@cimav.edu.mx)

\* Correspondence: [armando.zaragoza@cimav.edu.mx](mailto:armando.zaragoza@cimav.edu.mx). Tel.: +52-614-439-4811; Fax: +52-614-439-1130

**Citation:** Domínguez-Aragón, A.; Dominguez, R.B.; Zaragoza-Contreras, E.A. Simultaneous Detection of Dihydroxybenzene Isomers Using Electrochemically Reduced Graphene Oxide-Carboxylated Carbon Nanotubes/Gold Nanoparticles Nanocomposite. *Biosensors* **2021**, *11*, 321. <https://doi.org/10.3390/bios11090321>

Received: 3 August 2021

Accepted: 2 September 2021

Published: 7 September 2021

**Publisher's Note:** MDPI stays neutral with regard to jurisdictional claims in published maps and institutional affiliations.

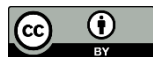

**Copyright:** © 2021 by the authors. Submitted for possible open access publication under the terms and conditions of the Creative Commons Attribution (CC BY) license (<http://creativecommons.org/licenses/by/4.0/>).

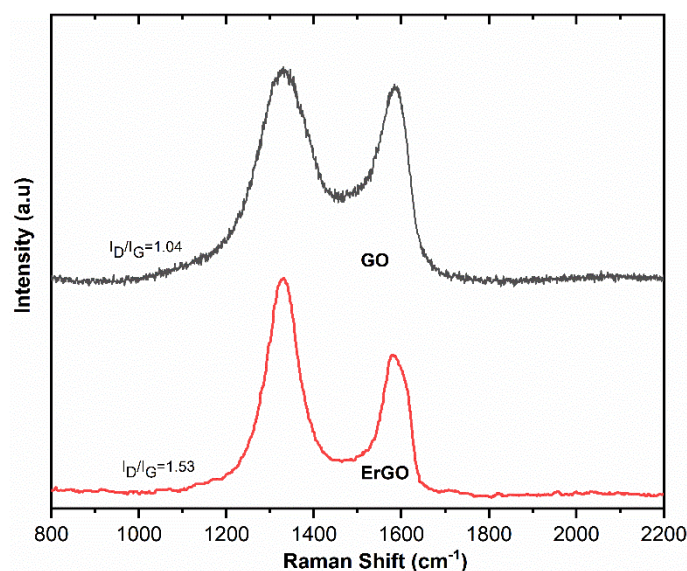

**Figure S1.** Raman spectra of GO and ErGO.

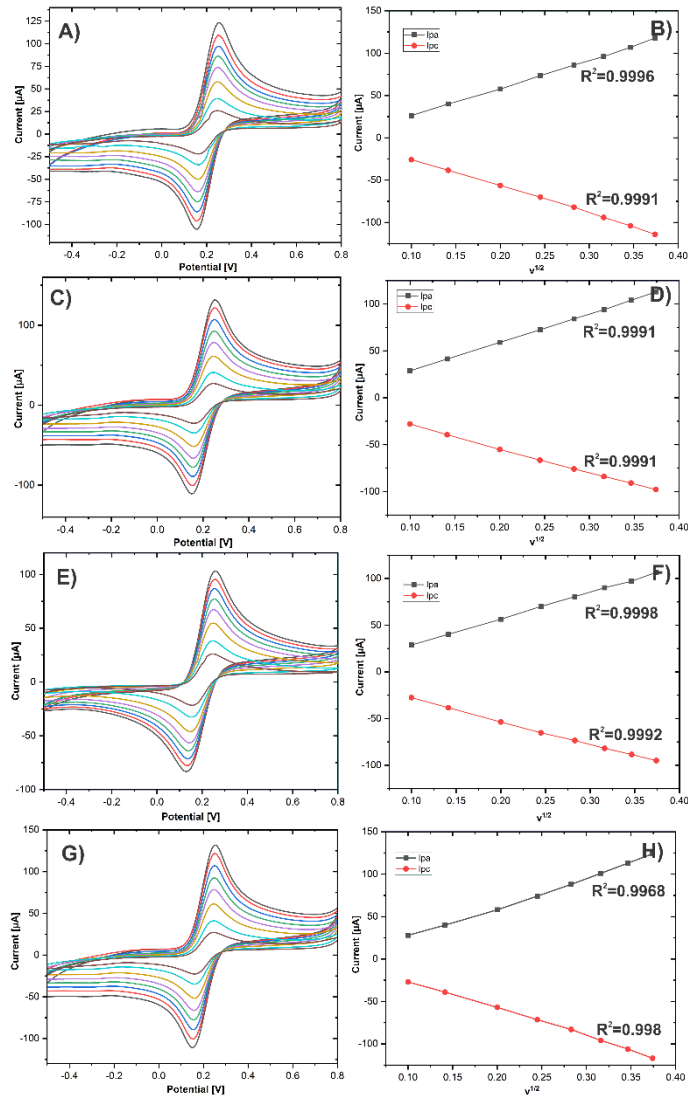

**Figure S2.** Cyclic voltammetry of A) GCE/AuNPs, C) GCE/cMWCNTAuNPs, E) GCE/ErGO-AuNPs, G) GCE/ErGOcMWCNTAuNPs at different scan rates in 5.0 mM  $[\text{Fe}(\text{CN})_6]^{3-/4-}$  containing PBS 0.01 M. The linear relationship between the anodic and cathodic peak currents versus root of the scan rate of B) GCE/AuNPs, D) GCE/cMWCNTAuNPs, F) GCE/ErGOAuNPs, H) GCE/ErGOcMWCNTAuNPs.

According to Laviron's theory [1] a reversible electrochemical process produces two straight lines with a slope equal to  $-2.3RT/\alpha nF$  for the cathodic peak and  $2.3RT/(1-\alpha)nF$  for the anodic peak. The charge transfer coefficient,  $\alpha$ , can be calculated based on the slopes of the two straight lines of  $E_p$  vs  $\log v$  using the following Equation (2):

$$\frac{k_a}{k_c} = \frac{\alpha}{1 - \alpha} \quad (2)$$

Where  $k_a$  and  $k_c$  are the slope of the straight lines for  $E_{pa}$  vs  $\log v$  and  $E_{pc}$  vs  $\log v$ , respectively. For HQ and CC (reversible process), the charge transfer coefficient ( $\alpha$ ) was calculated. The  $E_{pa}$  and  $E_{pc}$  are linearly dependent on the  $\log v$ , represented by the followed equations:  $E_{pa}$  (HQ) =  $0.0376 \log v + 0.1582$  ( $R^2 = 0.9909$ ),  $E_{pc}$  (HQ) =  $-0.0278 \log v + 0.0112$  ( $R^2 = 0.9918$ ),  $E_{pa}$  (CC) =  $0.0412 \log v + 0.2734$  ( $R^2 = 0.9962$ ),  $E_{pc}$  (CC) =  $-0.0263 \log v + 0.1457$  ( $R^2 = 0.995$ ). Thus, the  $\alpha$  was calculated to be 0.574 for HQ and 0.6103 for CC. In

addition, the apparent heterogeneous electron transfer rate constant ( $k_s$ ) was also calculated using the follow Equation (3):

$$\log k_s = \alpha \log(1 - \alpha) + (1 - \alpha) \log \alpha - \log \frac{RT}{nFv} - \frac{\alpha(1 - \alpha)nF\Delta E_p}{2.3RT} \quad (3)$$

where  $n$  is the number of electrons involved in the reaction, the  $\Delta E_p$  is the peak-to-peak separation,  $\alpha$  is the charge transfer coefficient,  $v$  is the scan rate,  $R$  is the gas constant (8.314 J K<sup>-1</sup> mol<sup>-1</sup>),  $T$  is the temperature (298 K), and  $F$  is the Faraday constant (96,485 C mol<sup>-1</sup>). The number of electrons involved in the reaction of HQ and CC was 2. Therefore, the values of  $k_s$  were calculated to be 0.693 cm s<sup>-1</sup> and 0.973 cm s<sup>-1</sup> for HQ and CC, respectively. These results indicated that the GCE/ErGO-cMWCNT/AuNPs promotes electron transfer effectively.

Due to the irreversible oxidation reaction of RS, it was used the Laviron's Equation (4) for the irreversible electrode process to calculate  $\alpha n$  and  $k_s$  values [2].

$$E_{pa} = E_0 - \left( \frac{RT}{\alpha nF} \right) \ln \left( \frac{RTk_s}{\alpha nF} \right) + \left( \frac{RT}{\alpha nF} \right) \ln v \quad (4)$$

Where  $\alpha$  is the charge transfer coefficient,  $n$  is the transfer electron number,  $k_s$  is the heterogeneous electron transfer rate constant,  $R$ ,  $T$ , and  $F$  have their usual meanings. The  $\alpha n$  was calculated as 0.82 and  $k_s$  value of RS was 0.49 s<sup>-1</sup> based on the slope and intercept of  $E_{pa}$  vs  $\ln v$  equation, respectively. Because the electron number involved in the oxidation process is 2,  $\alpha$  was calculated to be 0.41.

## References

1. Laviron, E. General expression of the linear potential sweep voltammogram in the case of diffusionless electrochemical systems. *J. Electroanal. Chem.* 1979, 101, 19–28, doi:10.1016/S0022-0728(79)80075-3.
2. Zhang, C.; Han, M.; Yu, L.; Qu, L.; Li, Z. Fabrication an electrochemical sensor based on composite of Cu-TCP nanosheets and PSS functionalized graphene for simultaneous and sensitive determination of dihydroxybenzene isomers. *J. Electroanal. Chem.* 2021, 890, 115232, doi:10.1016/j.jelechem.2021.115232.
